# Supplementary material for: Neutralizing antibodies induced in immunized macaques recognize the CD4-binding site on an occluded-open HIV-1 envelope trimer
Source: PubMed Central journal article supplement (PMC8826976; doi:10.1038/s41467-022-28424-3), 2022-02-08
Supplement: 41467_2022_28424_MOESM1_ESM.pdf [file 41467_2022_28424_MOESM1_ESM.pdf]

## Supplementary Information

### Neutralizing antibodies induced in immunized macaques recognize the CD4-binding site on an occluded-open HIV-1 envelope trimer

Zhi Yang<sup>1</sup>, Kim-Marie A. Dam<sup>1</sup>, Michael D. Bridges<sup>2,3</sup>, Magnus A.G. Hoffmann<sup>1</sup>, Andrew T. DeLaitsch<sup>1</sup>, Harry B. Gristick<sup>1</sup>, Amelia Escolano<sup>4</sup>, Rajeev Gautam<sup>5</sup>, Malcolm A. Martin<sup>5</sup>, Michel C. Nussenzweig<sup>4,6</sup>, Wayne L. Hubbell<sup>2,3</sup>, Pamela J. Bjorkman<sup>1,\*</sup>

<sup>1</sup>Division of Biology and Biological Engineering, California Institute of Technology, Pasadena, CA, USA

<sup>2</sup>Jules Stein Eye Institute, University of California, Los Angeles, CA, USA

<sup>3</sup>Department of Chemistry and Biochemistry, University of California, Los Angeles, CA, USA

<sup>4</sup>Laboratory of Molecular Immunology, The Rockefeller University, New York, NY, USA

<sup>5</sup>Laboratory of Molecular Microbiology, National Institute of Allergy and Infectious Diseases, National Institutes of Health, Bethesda, MD, USA

<sup>6</sup>Howard Hughes Medical Institute, Chevy Chase, MD, USA

\* Correspondence email: [bjorkman@caltech.edu](mailto:bjorkman@caltech.edu)



Ab1573 was isolated from NHP 1 (DGJI) after Boost 4 as described<sup>19</sup>. Representation is created with BioRender.com.

(b) Sequence alignments of Ab1303 and Ab1573 V<sub>H</sub> and V<sub>L</sub> domains with their germline V gene precursors.

(c) Crystal structures of unliganded Ab1303 and Ab1573 Fabs. CDRs of the two antibodies were highlighted in various colors.

(d) Superimposition of structures of bound (from Fab-Env cryo-EM structures) and free (from Fab crystal structures) V<sub>H</sub>-V<sub>L</sub> domains.

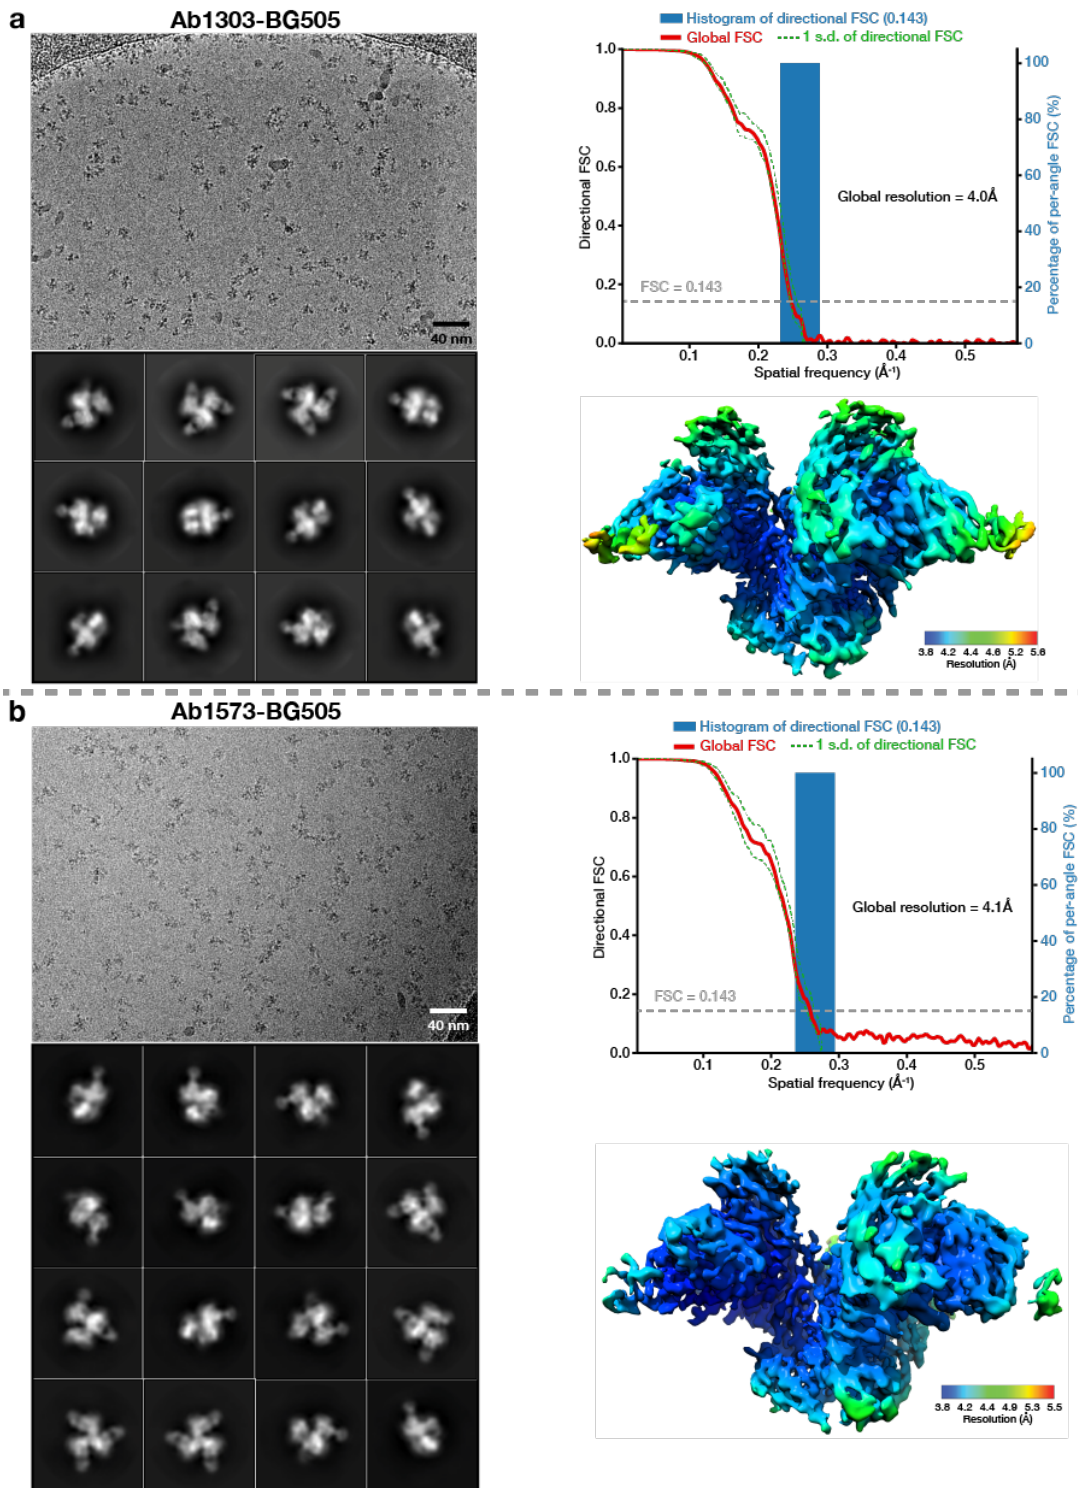

**Supplementary Figure 2. Cryo-EM processing, validation and reconstructions**

(a,b) Left: Example micrographs and 2D class averages of Ab1303-BG505 (a) and Ab1573-BG505 (b) complexes. Upper right: Plots of global half-map FSCs (solid red line), directional resolution values  $\pm 1\sigma$  from the mean (left axis, green dashed lines), and histogram distributions sampled over 3D FSC (right axis, blue bars) for Ab1303-BG505 (a) and Ab1573-BG505 (b). Bottom right: local resolution maps of Ab1303-BG505 (a) and Ab1573-BG505 (b).

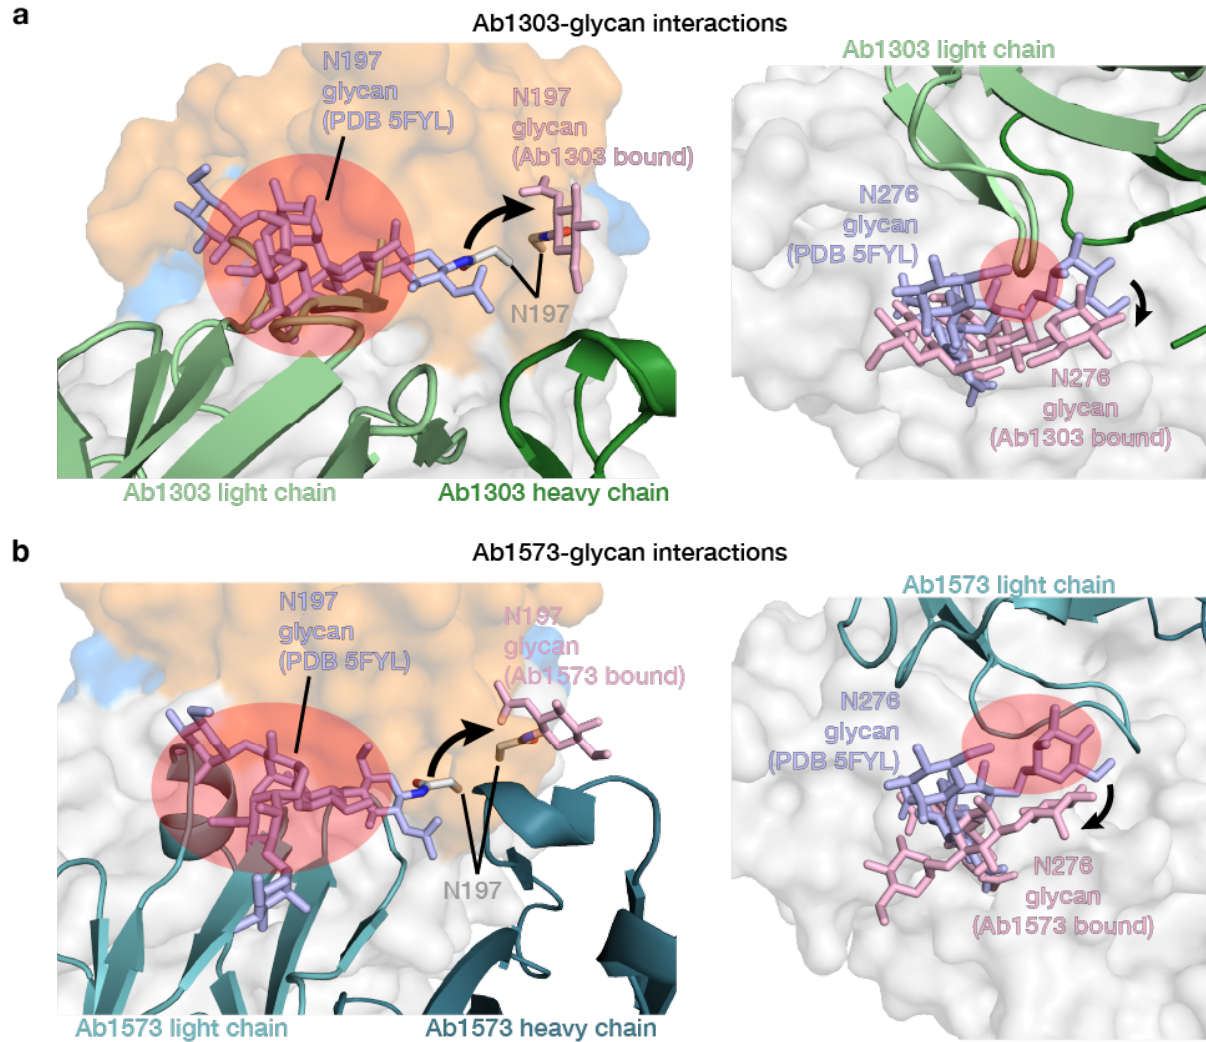

**Supplementary Figure 3. gp120 N-glycans were displaced to adapt for antibody binding.** Locations of Asn197<sub>gp120</sub> and Asn276<sub>gp120</sub> glycans (pink) in (a) Ab1303- and (b) Ab1573-bound Env structures were compared with an Env structure that does not have an antibody bound in the vicinity of this region (PDB 5FYL, glycans colored in light blue). Spatially close or clashing regions between the Fabs and glycans in a CD4bs Ab-free trimer are highlighted in red shades. Directions of glycan shifting are indicated with black arrows.

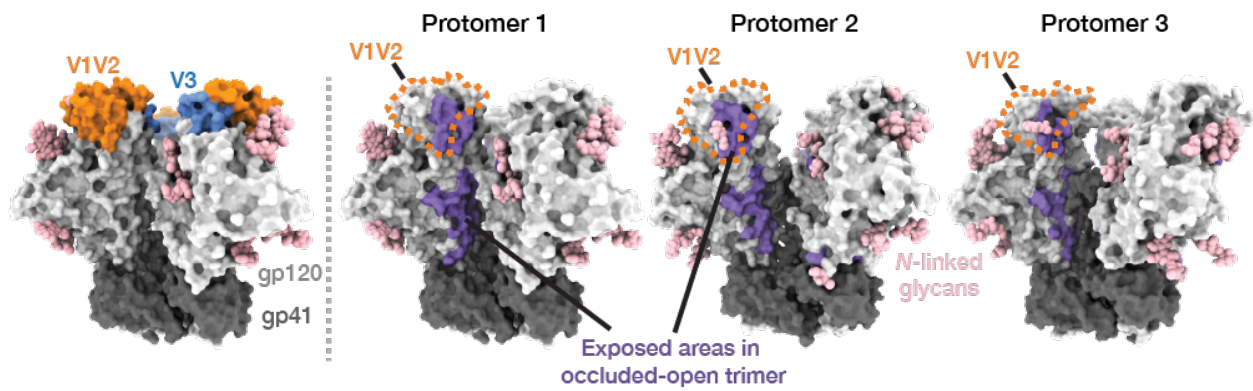

**Supplementary Figure 4. gp120 surface area exposed in occluded-open versus closed Env trimers.** Left: Occluded-open Env trimer showing V1V2 and V3 regions as colored highlights. Right: Env trimers showing surface areas (purple) that are exposed in occluded-open trimers but buried in closed trimers. Orange dashed shape indicates V1V2 region.

**Supplementary table 1. X-ray data collection and refinement statistics (molecular replacement)**

|                                                         | Ab1303 Fab (PDB 7RYU)                         | Ab1573 Fab (PDB 7RYV)      |
|---------------------------------------------------------|-----------------------------------------------|----------------------------|
| <b>Data collection</b>                                  |                                               |                            |
| Space group                                             | P2 <sub>1</sub> 2 <sub>1</sub> 2 <sub>1</sub> | P2 <sub>1</sub>            |
| Cell dimensions                                         |                                               |                            |
| <i>a</i> , <i>b</i> , <i>c</i> (Å)                      | 63.85, 66.97, 136.59                          | 81.50 138.40 83.73         |
| $\alpha$ , $\beta$ , $\gamma$ (°)                       | 90, 90, 90                                    | 90 95.71 90                |
| Resolution (Å)                                          | 38.27 - 1.51 (1.53 - 1.51) *                  | 38.91 – 2.50 (2.78-2.50) * |
| <i>R</i> <sub>merge</sub> (%)                           | 8.4 (124)                                     | 17.4 (98.1)                |
| <i>R</i> <sub>pim</sub> (%)                             | 2.4 (37.8)                                    | 10.8 (62.2)                |
| CC <sub>1/2</sub> (%)                                   | 99.9 (80.2)                                   | 99.4 (85.8)                |
| <i>I</i> / $\sigma$ <i>I</i>                            | 16.5 (1.2)                                    | 8.8 (2.8)                  |
| Completeness (%)                                        | 99.9 (98.2)                                   | 98.3 (95.9)                |
| Multiplicity                                            | 13.3 (11.4)                                   | 3.6 (3.6)                  |
| <b>Refinement</b>                                       |                                               |                            |
| Resolution (Å)                                          | 1.51                                          | 2.50                       |
| No. reflections                                         | 92,598 (9,145)                                | 63,132 (6,140)             |
| <i>R</i> <sub>free</sub> / <i>R</i> <sub>work</sub> (%) | 20.0 / 18.0                                   | 25.7 / 22.4                |
| No. atoms                                               |                                               |                            |
| Protein                                                 | 3,330                                         | 12,931                     |
| Ligand/ion                                              | 0                                             | 0                          |
| Water                                                   | 680                                           | 880                        |
| R.m.s. deviations                                       |                                               |                            |
| Bond lengths (Å)                                        | 0.008                                         | 0.006                      |
| Bond angles (°)                                         | 0.86                                          | 1.15                       |
| Rotamer outliers (%)                                    | 0                                             | 0.34                       |
| Ramachandran plot                                       |                                               |                            |
| Favored (%)                                             | 99.3                                          | 97.3                       |
| Allowed (%)                                             | 0.7                                           | 2.7                        |
| Disallowed                                              | 0                                             | 0                          |
| Average <i>B</i> -factor                                | 27.0                                          | 30.2                       |

\*Values in parentheses are for highest-resolution shell.

**Supplementary table 2. Cryo-EM data collection, refinement, and validation statistics**

|                                                    | Ab1303-BG505<br>(PDB 7TFN)<br>(EMDB-25877) | Ab1573-BG505<br>(PDB 7TFO)<br>(EMDB-25878) |
|----------------------------------------------------|--------------------------------------------|--------------------------------------------|
| <b>Data collection and processing</b>              |                                            |                                            |
| Magnification *                                    | 105,000x                                   | 105,000x                                   |
| Voltage (kV)                                       | 200                                        | 300                                        |
| Electron exposure (e-/Å <sup>2</sup> )             | 60                                         | 60                                         |
| Defocus range (µm)                                 | 1.4-3.0                                    | 1.4-3.0                                    |
| Pixel size (Å)                                     | 0.4345                                     | 0.4275                                     |
| Recording mode                                     | Super resolution                           | Super resolution                           |
| Symmetry imposed                                   | C1                                         | C1                                         |
| Initial particle images (no.)                      | 1,095,744                                  | 842,259                                    |
| Final particle images (no.)                        | 386,825                                    | 443,817                                    |
| Overall map resolution (Å) **<br>(masked/unmasked) | 4.0 (4.4)                                  | 4.1 (4.4)                                  |
| <b>Refinement</b>                                  |                                            |                                            |
| Initial model used (PDB code)                      | 5CEZ ***                                   | 5CEZ ***                                   |
| Map and model CC                                   | 0.77                                       | 0.73                                       |
| Map sharpening <i>B</i> factor (Å <sup>2</sup> )   | 79.3                                       | 112                                        |
| Model composition                                  |                                            |                                            |
| Protein residues                                   | 2344                                       | 2283                                       |
| Carbohydrate residues                              | 57                                         | 21                                         |
| Validation                                         |                                            |                                            |
| MolProbity score                                   | 2.06                                       | 2.23                                       |
| Clashscore                                         | 14.1                                       | 16.4                                       |
| Poor rotamers (%)                                  | 0                                          | 0                                          |
| Ramachandran plot                                  |                                            |                                            |
| Favored (%)                                        | 93.9                                       | 91.1                                       |
| Allowed (%)                                        | 6.1                                        | 8.9                                        |
| Disallowed (%)                                     | 0                                          | 0                                          |
| RMS deviations                                     |                                            |                                            |
| Length (Å)                                         | 0.003                                      | 0.005                                      |
| Angles (°)                                         | 0.63                                       | 0.70                                       |

\* Nominal magnification; \*\* FSC threshold 0.143; \*\*\* Partial structure composed of trimeric gp120/gp41
