# Supplementary material for: Neutralizing antibodies induced in immunized macaques recognize the CD4-binding site on an occluded-open HIV-1 envelope trimer
Source: PubMed Central journal article supplement (PMC8826976; doi:10.1038/s41467-022-28424-3), 2022-02-08
Supplement: 41467_2022_28424_MOESM3_ESM.pdf [file 41467_2022_28424_MOESM3_ESM.pdf]

## **Description of Additional Supplementary Information**

**Title:** Supplementary Movie 1

**Description:** Review of the HIV-1 Env conformational changes among the closed, occluded-open, and CD4- induced fully-open states.”
